# Supplementary material for: Exploring Metabolic Pathways of Anamorelin, a Selective Agonist of the Growth Hormone Secretagogue Receptor, via Molecular Networking
Source: MDPI journal article supplement (doi:10.3390/pharmaceutics15122700), 2023-11-29
Supplement: s1 [file s1]

## Supplementary data

**Table S1.** Accurate mass data of anamorelin and its metabolites in HLM. The table summarizes expected biotransformation based on retention time (RT) and characteristic fragment ions.

| Compound   | Type of biotransformation    | Retention time (min) | Elemental comp. (exp.)                                        | Theoretical mass ( <i>m/z</i> ) | Measured mass ( <i>m/z</i> ) | Error (ppm) |
|------------|------------------------------|----------------------|---------------------------------------------------------------|---------------------------------|------------------------------|-------------|
| Anamorelin | Parent                       | 17.7                 | C <sub>31</sub> H <sub>43</sub> N <sub>6</sub> O <sub>3</sub> | 547.3391                        | 547.3389                     | -0.3        |
|            |                              |                      | C <sub>16</sub> H <sub>26</sub> N <sub>3</sub> O              | 276.207                         | 276.2067                     | -1          |
|            |                              |                      | C <sub>13</sub> H <sub>16</sub> NO                            | 202.1226                        | 202.1224                     | -0.9        |
|            |                              |                      | C <sub>12</sub> H <sub>16</sub> N                             | 174.1277                        | 174.1275                     | -1.1        |
|            |                              |                      | C <sub>5</sub> H <sub>9</sub> N <sub>2</sub> O                | 113.0709                        | 113.0712                     | 2.6         |
|            |                              |                      | C <sub>3</sub> H <sub>11</sub> N <sub>2</sub>                 | 75.0917                         | 75.0924                      | 9.3         |
|            |                              |                      | C <sub>3</sub> H <sub>8</sub> N                               | 58.0658                         | 58.0658                      | 0           |
| M1         | Demethylation                | 16.9                 | C <sub>30</sub> H <sub>41</sub> N <sub>6</sub> O <sub>3</sub> | 533.3235                        | 533.3235                     | 0           |
|            |                              |                      | C <sub>15</sub> H <sub>24</sub> N <sub>3</sub> O              | 262.1914                        | 262.191                      | -1.5        |
|            |                              |                      | C <sub>15</sub> H <sub>21</sub> N <sub>2</sub> O              | 245.1648                        | 245.1646                     | -0.8        |
|            |                              |                      | C <sub>13</sub> H <sub>16</sub> NO                            | 202.1226                        | 202.1222                     | -2          |
|            |                              |                      | C <sub>12</sub> H <sub>16</sub> N                             | 174.1277                        | 174.1276                     | -0.6        |
|            |                              |                      | C <sub>8</sub> H <sub>14</sub> N <sub>2</sub> O               | 154.1101                        | 154.1098                     | -1.9        |
|            |                              |                      | C <sub>5</sub> H <sub>9</sub> N <sub>2</sub> O                | 113.0709                        | 113.0712                     | 2.7         |
|            |                              |                      | C <sub>3</sub> H <sub>9</sub> N <sub>2</sub>                  | 73.076                          | 73.0768                      | 10.9        |
|            |                              |                      | C <sub>3</sub> H <sub>8</sub> N                               | 58.0658                         | 58.066                       | 3.4         |
| M2         | Demethylation + desaturation | 17.6                 | C <sub>30</sub> H <sub>39</sub> N <sub>6</sub> O <sub>3</sub> | 531.3078                        | 531.3083                     | 0.9         |
|            |                              |                      | C <sub>15</sub> H <sub>22</sub> N <sub>3</sub> O              | 260.1757                        | 260.1755                     | -0.8        |
|            |                              |                      | C <sub>13</sub> H <sub>16</sub> NO                            | 202.1226                        | 202.1223                     | -1.5        |
|            |                              |                      | C <sub>12</sub> H <sub>16</sub> N                             | 174.1277                        | 174.1277                     | 0           |
|            |                              |                      | C <sub>8</sub> H <sub>13</sub> N <sub>2</sub> O               | 153.1022                        | 153.1022                     | 0           |
|            |                              |                      | C <sub>5</sub> H <sub>9</sub> N <sub>2</sub> O                | 113.0709                        | 113.0712                     | 2.7         |
|            |                              |                      | C <sub>3</sub> H <sub>8</sub> N                               | 58.0658                         | 58.066                       | 3.4         |

Table S1. *Cont.*

| Compound | Type of biotransformation | Retention time (min) | Elemental comp. (exp.)                                        | Theoretical mass ( <i>m/z</i> ) | Measured mass ( <i>m/z</i> ) | Error (ppm) |
|----------|---------------------------|----------------------|---------------------------------------------------------------|---------------------------------|------------------------------|-------------|
| M3a      | Hydroxylation             | 15.8                 | C <sub>31</sub> H <sub>43</sub> N <sub>6</sub> O <sub>4</sub> | 563.334                         | 563.3372                     | 5.7         |
|          |                           |                      | C <sub>16</sub> H <sub>26</sub> N <sub>3</sub> O              | 276.207                         | 276.2068                     | -0.7        |
|          |                           |                      | C <sub>13</sub> H <sub>16</sub> NO                            | 202.1226                        | 202.1224                     | -1          |
|          |                           |                      | C <sub>12</sub> H <sub>16</sub> N                             | 174.1277                        | 174.1276                     | -0.6        |
|          |                           |                      | C <sub>5</sub> H <sub>9</sub> N <sub>2</sub> O                | 113.0709                        | 113.0711                     | 1.8         |
|          |                           |                      | C <sub>3</sub> H <sub>11</sub> N <sub>2</sub>                 | 75.0917                         | 75.0924                      | 9.3         |
|          |                           |                      | C <sub>3</sub> H <sub>8</sub> N                               | 58.0658                         | 58.066                       | 3.4         |
|          |                           |                      | C <sub>9</sub> H <sub>10</sub> ON                             | 148.0757                        | 148.0756                     | -0.6        |
| M3b      | Hydroxylation             | 16.5                 | C <sub>31</sub> H <sub>43</sub> N <sub>6</sub> O <sub>4</sub> | 563.334                         | 563.3371                     | 5.5         |
|          |                           |                      | C <sub>16</sub> H <sub>26</sub> N <sub>3</sub> O              | 276.207                         | 276.2071                     | 0.3         |
|          |                           |                      | C <sub>13</sub> H <sub>16</sub> NO                            | 202.1226                        | 202.1225                     | -0.4        |
|          |                           |                      | C <sub>12</sub> H <sub>16</sub> N                             | 174.1277                        | 174.1277                     | 0           |
|          |                           |                      | C <sub>5</sub> H <sub>9</sub> N <sub>2</sub> O                | 113.0709                        | 113.0711                     | 1.7         |
|          |                           |                      | C <sub>3</sub> H <sub>11</sub> N <sub>2</sub>                 | 75.0917                         | 75.0925                      | 10.6        |
|          |                           |                      | C <sub>3</sub> H <sub>8</sub> N                               | 58.0658                         | 58.066                       | 3.4         |
| M4a      | Dihydroxylation           | 15.2                 | C <sub>31</sub> H <sub>43</sub> N <sub>6</sub> O <sub>5</sub> | 579.3289                        | 579.3322                     | 5.7         |
|          |                           |                      | C <sub>16</sub> H <sub>26</sub> N <sub>3</sub> O              | 276.207                         | 276.2071                     | 0.4         |
|          |                           |                      | C <sub>13</sub> H <sub>16</sub> NO                            | 202.1226                        | 202.1226                     | 0           |
|          |                           |                      | C <sub>12</sub> H <sub>16</sub> N                             | 174.1277                        | 174.1276                     | -0.6        |
|          |                           |                      | C <sub>3</sub> H <sub>11</sub> N <sub>2</sub>                 | 75.0917                         | 75.0924                      | 9.3         |
|          |                           |                      | C <sub>3</sub> H <sub>8</sub> N                               | 58.0658                         | 58.066                       | 3.4         |
| M4b      | Dihydroxylation           | 15.4                 | C <sub>31</sub> H <sub>43</sub> N <sub>6</sub> O <sub>5</sub> | 579.3289                        | 579.3322                     | 5.6         |
|          |                           |                      | C <sub>16</sub> H <sub>26</sub> N <sub>3</sub> O              | 276.207                         | 276.2068                     | -0.7        |
|          |                           |                      | C <sub>13</sub> H <sub>16</sub> NO                            | 202.1226                        | 202.1229                     | 1.4         |
|          |                           |                      | C <sub>12</sub> H <sub>16</sub> N                             | 174.1277                        | 174.1277                     | 0           |
|          |                           |                      | C <sub>3</sub> H <sub>11</sub> N <sub>2</sub>                 | 75.0917                         | 75.0925                      | 10.6        |
|          |                           |                      | C <sub>3</sub> H <sub>8</sub> N                               | 58.0658                         | 58.066                       | 3.4         |

**Table S1. Cont.**

| Compound | Type of biotransformation     | Retention time (min) | Elemental comp. (exp.)                                        | Theoretical mass ( <i>m/z</i> ) | Measured mass ( <i>m/z</i> ) | Error (ppm) |
|----------|-------------------------------|----------------------|---------------------------------------------------------------|---------------------------------|------------------------------|-------------|
| M4c      | Dihydroxylation               | 15.8                 | C <sub>31</sub> H <sub>43</sub> N <sub>6</sub> O <sub>5</sub> | 579.3289                        | 579.3323                     | 5.8         |
|          |                               |                      | C <sub>16</sub> H <sub>26</sub> N <sub>3</sub> O              | 276.207                         | 276.2076                     | 2.1         |
|          |                               |                      | C <sub>13</sub> H <sub>16</sub> NO                            | 202.1226                        | 202.1226                     | 0           |
|          |                               |                      | C <sub>12</sub> H <sub>16</sub> N                             | 174.1277                        | 174.1277                     | 0           |
|          |                               |                      | C <sub>3</sub> H <sub>11</sub> N <sub>2</sub>                 | 75.0917                         | 75.0925                      | 10.6        |
|          |                               |                      | C <sub>3</sub> H <sub>8</sub> N                               | 58.0658                         | 58.0661                      | 5.1         |
| M5a      | Hydroxylation + demethylation | 14.9                 | C <sub>30</sub> H <sub>41</sub> N <sub>6</sub> O <sub>4</sub> | 549.3183                        | 549.319                      | 1.3         |
|          |                               |                      | C <sub>15</sub> H <sub>24</sub> N <sub>3</sub> O              | 262.1914                        | 262.1908                     | -2.3        |
|          |                               |                      | C <sub>15</sub> H <sub>21</sub> N <sub>2</sub> O              | 245.1648                        | 245.1646                     | -0.8        |
|          |                               |                      | C <sub>13</sub> H <sub>16</sub> NO                            | 202.1226                        | 202.1223                     | -1.5        |
|          |                               |                      | C <sub>12</sub> H <sub>16</sub> N                             | 174.1277                        | 174.1276                     | -0.6        |
|          |                               |                      | C <sub>8</sub> H <sub>14</sub> N <sub>2</sub> O               | 154.1101                        | 154.1101                     | 0           |
|          |                               |                      | C <sub>3</sub> H <sub>9</sub> N <sub>2</sub>                  | 73.076                          | 73.0768                      | 10.9        |
|          |                               |                      | C <sub>3</sub> H <sub>8</sub> N                               | 58.0658                         | 58.0661                      | 5.2         |
| M5b      | Hydroxylation + demethylation | 15.6                 | C <sub>9</sub> H <sub>10</sub> ON                             | 148.0757                        | 148.0751                     | -4.5        |
|          |                               |                      | C <sub>30</sub> H <sub>41</sub> N <sub>6</sub> O <sub>4</sub> | 549.3183                        | 549.3189                     | 1           |
|          |                               |                      | C <sub>15</sub> H <sub>24</sub> N <sub>3</sub> O              | 262.1914                        | 262.1916                     | 0.7         |
|          |                               |                      | C <sub>15</sub> H <sub>21</sub> N <sub>2</sub> O              | 245.1648                        | 245.1645                     | -1.2        |
|          |                               |                      | C <sub>13</sub> H <sub>16</sub> NO                            | 202.1226                        | 202.1223                     | -1.4        |
|          |                               |                      | C <sub>12</sub> H <sub>16</sub> N                             | 174.1277                        | 174.1278                     | 0.5         |
|          |                               |                      | C <sub>3</sub> H <sub>9</sub> N <sub>2</sub>                  | 73.076                          | 73.0768                      | 10.9        |
|          |                               |                      | C <sub>3</sub> H <sub>8</sub> N                               | 58.0658                         | 58.0661                      | 5.1         |

**Table S1. Cont.**

| Compound | Type<br>biotransformation                 | of | Retention<br>time (min) | Elemental<br>comp. (exp.)                                     | Theoretical<br>mass ( <i>m/z</i> ) | Measured<br>mass ( <i>m/z</i> ) | Error<br>(ppm) |
|----------|-------------------------------------------|----|-------------------------|---------------------------------------------------------------|------------------------------------|---------------------------------|----------------|
| M5c      | Hydroxylation +<br>demethylation          |    | 15.9                    | C <sub>30</sub> H <sub>41</sub> N <sub>6</sub> O <sub>4</sub> | 549.3183                           | 549.319                         | 1.2            |
|          |                                           |    |                         | C <sub>15</sub> H <sub>24</sub> N <sub>3</sub> O              | 262.1914                           | 262.1911                        | -1.1           |
|          |                                           |    |                         | C <sub>15</sub> H <sub>21</sub> N <sub>2</sub> O              | 245.1648                           | 245.165                         | 0.8            |
|          |                                           |    |                         | C <sub>12</sub> H <sub>16</sub> N                             | 174.1277                           | 174.1278                        | 0.5            |
|          |                                           |    |                         | C <sub>3</sub> H <sub>9</sub> N <sub>2</sub>                  | 73.076                             | 73.0768                         | 10.9           |
|          |                                           |    |                         | C <sub>3</sub> H <sub>8</sub> N                               | 58.0658                            | 58.066                          | 3.4            |
| M6       | Hydroxylation<br>desaturation             | +  | 15.7                    | C <sub>31</sub> H <sub>41</sub> N <sub>6</sub> O <sub>4</sub> | 561.3184                           | 561.3214                        | 5.3            |
|          |                                           |    |                         | C <sub>13</sub> H <sub>16</sub> NO                            | 202.1226                           | 202.1225                        | -0.5           |
|          |                                           |    |                         | C <sub>12</sub> H <sub>16</sub> N                             | 174.1277                           | 174.1277                        | 0              |
|          |                                           |    |                         | C <sub>5</sub> H <sub>9</sub> N <sub>2</sub> O                | 113.0709                           | 113.0712                        | 2.7            |
|          |                                           |    |                         | C <sub>3</sub> H <sub>8</sub> N                               | 58.0658                            | 58.066                          | 3.4            |
| M7       | <i>N</i> -dealkylation                    |    | 14.2                    | C <sub>16</sub> H <sub>26</sub> N <sub>3</sub> O              | 276.207                            | 276.2072                        | 0.7            |
|          |                                           |    |                         | C <sub>13</sub> H <sub>16</sub> NO                            | 202.1226                           | 202.1225                        | -0.5           |
|          |                                           |    |                         | C <sub>12</sub> H <sub>16</sub> N                             | 174.1277                           | 174.1275                        | -1.1           |
|          |                                           |    |                         | C <sub>3</sub> H <sub>11</sub> N <sub>2</sub>                 | 75.0917                            | 75.0924                         | 9.3            |
| M8       | <i>N</i> -dealkylation +<br>demethylation |    | 12.5                    | C <sub>15</sub> H <sub>24</sub> N <sub>3</sub> O              | 262.1914                           | 262.1916                        | 0.8            |
|          |                                           |    |                         | C <sub>15</sub> H <sub>21</sub> N <sub>2</sub> O              | 245.1648                           | 245.1647                        | -0.4           |
|          |                                           |    |                         | C <sub>13</sub> H <sub>16</sub> NO                            | 202.1226                           | 202.1225                        | -0.5           |
|          |                                           |    |                         | C <sub>12</sub> H <sub>16</sub> N                             | 174.1277                           | 174.1277                        | 0              |
|          |                                           |    |                         | C <sub>8</sub> H <sub>13</sub> N <sub>2</sub> O               | 153.1022                           | 153.1022                        | 0              |
|          |                                           |    |                         | C <sub>3</sub> H <sub>9</sub> N <sub>2</sub>                  | 73.076                             | 73.0768                         | 10.9           |

**Table S1.** *Cont.*

| Compound | Type of biotransformation                             | Retention time (min) | Elemental comp. (exp.)                                        | Theoretical mass ( <i>m/z</i> ) | Measured mass ( <i>m/z</i> ) | Error (ppm) |
|----------|-------------------------------------------------------|----------------------|---------------------------------------------------------------|---------------------------------|------------------------------|-------------|
| M9       | <i>N</i> -dealkylation + demethylation + desaturation | 13.6                 | C <sub>15</sub> H <sub>22</sub> N <sub>3</sub> O              | 260.1757                        | 260.1761                     | 1.5         |
|          |                                                       |                      | C <sub>12</sub> H <sub>16</sub> N                             | 174.1277                        | 174.1276                     | -0.6        |
|          |                                                       |                      | C <sub>8</sub> H <sub>13</sub> N <sub>2</sub> O               | 153.1022                        | 153.1022                     | 0           |
| M10      | <i>N</i> -oxidation                                   | 19.5                 | C <sub>31</sub> H <sub>43</sub> N <sub>6</sub> O <sub>4</sub> | 563.334                         | 563.3372                     | 5.7         |
|          |                                                       |                      | C <sub>16</sub> H <sub>26</sub> N <sub>3</sub> O              | 276.207                         | 276.2068                     | -0.7        |
|          |                                                       |                      | C <sub>13</sub> H <sub>16</sub> NO                            | 202.1226                        | 202.1226                     | 0           |
|          |                                                       |                      | C <sub>12</sub> H <sub>16</sub> N                             | 174.1277                        | 174.1276                     | -0.6        |
|          |                                                       |                      | C <sub>3</sub> H <sub>11</sub> N <sub>2</sub>                 | 75.0917                         | 75.0924                      | 9.3         |
| M11a     | <i>N</i> -oxidation + hydroxylation                   | 16.6                 | C <sub>31</sub> H <sub>43</sub> N <sub>6</sub> O <sub>5</sub> | 579.3289                        | 579.3321                     | 5.5         |
|          |                                                       |                      | C <sub>16</sub> H <sub>26</sub> N <sub>3</sub> O              | 276.207                         | 276.2071                     | 0.3         |
|          |                                                       |                      | C <sub>13</sub> H <sub>16</sub> NO                            | 202.1226                        | 202.1226                     | 0           |
|          |                                                       |                      | C <sub>12</sub> H <sub>16</sub> N                             | 174.1277                        | 174.1276                     | -0.5        |
|          |                                                       |                      | C <sub>3</sub> H <sub>11</sub> N <sub>2</sub>                 | 75.0917                         | 75.0924                      | 9.3         |
| M11b     | <i>N</i> -oxidation + hydroxylation                   | 16.9                 | C <sub>3</sub> H <sub>8</sub> N                               | 58.0658                         | 58.0661                      | 5.1         |
|          |                                                       |                      | C <sub>31</sub> H <sub>43</sub> N <sub>6</sub> O <sub>5</sub> | 579.3289                        | 579.3322                     | 5.7         |
|          |                                                       |                      | C <sub>16</sub> H <sub>26</sub> N <sub>3</sub> O              | 276.207                         | 276.2069                     | -0.4        |
|          |                                                       |                      | C <sub>15</sub> H <sub>21</sub> N <sub>2</sub> O              | 245.1648                        | 245.1643                     | -2          |
|          |                                                       |                      | C <sub>13</sub> H <sub>16</sub> NO                            | 202.1226                        | 202.1226                     | 0           |
|          |                                                       |                      | C <sub>12</sub> H <sub>16</sub> N                             | 174.1277                        | 174.1278                     | 0.6         |
|          |                                                       |                      | C <sub>3</sub> H <sub>11</sub> N <sub>2</sub>                 | 75.0917                         | 75.0924                      | 9.3         |
| M12      | <i>N</i> -oxidation + demethylation                   | 18.9                 | C <sub>3</sub> H <sub>9</sub> N <sub>2</sub>                  | 73.076                          | 73.0768                      | 10.9        |
|          |                                                       |                      | C <sub>30</sub> H <sub>41</sub> N <sub>6</sub> O <sub>4</sub> | 549.3183                        | 549.319                      | 1.3         |
|          |                                                       |                      | C <sub>15</sub> H <sub>24</sub> N <sub>3</sub> O              | 262.1914                        | 262.1904                     | -3.8        |
|          |                                                       |                      | C <sub>15</sub> H <sub>21</sub> N <sub>2</sub> O              | 245.1648                        | 245.1646                     | -0.8        |
|          |                                                       |                      | C <sub>13</sub> H <sub>16</sub> NO                            | 202.1226                        | 202.1221                     | -2.5        |
|          |                                                       |                      | C <sub>12</sub> H <sub>16</sub> N                             | 174.1277                        | 174.1277                     | 0           |

Table S1. *Cont.*

| Compound | Type of biotransformation | Retention time (min) | Elemental comp. (exp.)                                        | Theoretical mass ( <i>m/z</i> ) | Measured mass ( <i>m/z</i> ) | Error (ppm) |
|----------|---------------------------|----------------------|---------------------------------------------------------------|---------------------------------|------------------------------|-------------|
| M13a*    | +CO                       | 16.7                 | C <sub>32</sub> H <sub>43</sub> N <sub>6</sub> O <sub>4</sub> | 575.3345                        | 575.3367                     | 3.8         |
|          |                           |                      | C <sub>16</sub> H <sub>26</sub> N <sub>3</sub> O              | 276.207                         | 276.2068                     | -0.7        |
|          |                           |                      | C <sub>13</sub> H <sub>16</sub> NO                            | 202.1226                        | 202.1221                     | -2.5        |
|          |                           |                      | C <sub>11</sub> H <sub>11</sub> N <sub>2</sub> O              | 187.0865                        | 187.0865                     | 0           |
|          |                           |                      | C <sub>12</sub> H <sub>16</sub> N                             | 174.1277                        | 174.1276                     | -0.6        |
|          |                           |                      | C <sub>3</sub> H <sub>11</sub> N <sub>2</sub>                 | 75.0917                         | 75.0925                      | 10.7        |
| M13b*    | +CO                       | 18.0                 | C <sub>32</sub> H <sub>43</sub> N <sub>6</sub> O <sub>4</sub> | 575.3345                        | 575.3367                     | 3.8         |
|          |                           |                      | C <sub>16</sub> H <sub>26</sub> N <sub>3</sub> O              | 276.207                         | 276.2074                     | 1.4         |
|          |                           |                      | C <sub>13</sub> H <sub>16</sub> NO                            | 202.1226                        | 202.123                      | 1.9         |
|          |                           |                      | C <sub>12</sub> H <sub>16</sub> N                             | 174.1277                        | 174.1276                     | -0.5        |
|          |                           |                      | C <sub>3</sub> H <sub>11</sub> N <sub>2</sub>                 | 75.0917                         | 75.0925                      | 10.6        |
| M14a*    | CO + oxidation            | 17.8                 | C <sub>32</sub> H <sub>43</sub> N <sub>6</sub> O <sub>5</sub> | 591.3274                        | 591.3317                     | 7.2         |
|          |                           |                      | C <sub>16</sub> H <sub>26</sub> N <sub>3</sub> O              | 276.207                         | 276.2076                     | 2.1         |
|          |                           |                      | C <sub>13</sub> H <sub>16</sub> NO                            | 202.1226                        | 202.1228                     | 0.9         |
|          |                           |                      | C <sub>12</sub> H <sub>16</sub> N                             | 174.1277                        | 174.1277                     | 0           |
|          |                           |                      | C <sub>3</sub> H <sub>11</sub> N <sub>2</sub>                 | 75.0917                         | 75.0924                      | 9.3         |
| M14b*    | CO + oxidation            | 19.1                 | C <sub>32</sub> H <sub>43</sub> N <sub>6</sub> O <sub>5</sub> | 591.3274                        | 591.3317                     | 7.2         |
|          |                           |                      | C <sub>16</sub> H <sub>26</sub> N <sub>3</sub> O              | 276.207                         | 276.2069                     | -0.3        |
|          |                           |                      | C <sub>13</sub> H <sub>16</sub> NO                            | 202.1226                        | 202.1224                     | -0.9        |
|          |                           |                      | C <sub>11</sub> H <sub>11</sub> N <sub>2</sub> O              | 187.0865                        | 187.0864                     | -0.5        |
|          |                           |                      | C <sub>12</sub> H <sub>16</sub> N                             | 174.1277                        | 174.1275                     | 1.1         |
| M15a*    | CO + demethylation        | 15.6                 | C <sub>31</sub> H <sub>41</sub> N <sub>6</sub> O <sub>4</sub> | 561.3184                        | 561.3218                     | 6.0         |
|          |                           |                      | C <sub>11</sub> H <sub>11</sub> N <sub>2</sub> O              | 187.0865                        | 187.0863                     | -1.0        |
|          |                           |                      | C <sub>15</sub> H <sub>21</sub> N <sub>2</sub> O              | 245.1648                        | 245.1646                     | -0.8        |
|          |                           |                      | C <sub>3</sub> H <sub>9</sub> N <sub>2</sub>                  | 73.076                          | 73.0769                      | 12.3        |
| M15b*    | CO + demethylation        | 16.9                 | C <sub>31</sub> H <sub>41</sub> N <sub>6</sub> O <sub>4</sub> | 561.3184                        | 561.3213                     | 5.1         |
|          |                           |                      | C <sub>12</sub> H <sub>16</sub> N                             | 174.1277                        | 174.1278                     | 0.5         |
|          |                           |                      | C <sub>15</sub> H <sub>21</sub> N <sub>2</sub> O              | 245.1648                        | 245.1644                     | -1.6        |
|          |                           |                      | C <sub>3</sub> H <sub>8</sub> N                               | 58.0658                         | 58.0662                      | 6.8         |
